# Supplementary material for: Attribution of aerosol particle number size distributions to major sources using a 11-year-long urban dataset
Source: Copernicus journal article supplement (doi:10.5194/egusphere-2024-316), 2024-02-13
Supplement: Supplementary file 1 [file egusphere-2024-316-supplement.pdf]

# Attribution of aerosol particle number size distributions to major sources using a 11-year-long urban dataset

Máté Vörösmarty<sup>1</sup>, Philip K. Hopke<sup>2,3</sup>, and Imre Salma<sup>4</sup>

<sup>1</sup> Hevesy György Ph.D. School of Chemistry, Eötvös Loránd University, Budapest, Hungary

<sup>2</sup> Department of Public Health Sciences, University of Rochester School of Medicine and Dentistry, Rochester, NY, USA

<sup>3</sup> Institute for a Sustainable Environment, Clarkson University, Potsdam, NY, USA

<sup>4</sup> Institute of Chemistry, Eötvös Loránd University, Budapest, Hungary

**Correspondence:** Imre Salma (salma.imre@ttk.elte.hu) and Máté Vörösmarty (vmate6@student.elte.hu)

**Table S1.** Start and end dates of the measurement years with the median concentrations of total particle numbers ( $N_{6-1000}$ ; in  $10^3 \text{ cm}^{-3}$ ), NO, NO<sub>2</sub>, O<sub>3</sub>, CO, SO<sub>2</sub> and PM<sub>10</sub> mass (all in  $\mu\text{g m}^{-3}$ ). The measurements in year Y2 were conducted in the near-city background, whereas the other data were obtained in the urban background of Budapest.

| Year | Start       | End         | $N_{6-1000}$ | NO   | NO <sub>2</sub> | O <sub>3</sub> | CO  | SO <sub>2</sub> | PM <sub>10</sub> |
|------|-------------|-------------|--------------|------|-----------------|----------------|-----|-----------------|------------------|
| Y1   | 3–Nov–2008  | 2–Nov–2009  | 11.3         | 13.4 | 37              | 25             | 547 | 5.0             | 33               |
| Y2   | 19–Jan–2012 | 18–Jan–2013 | 4.2          | 3.9  | 15.4            | 51             | 378 | 6.1             | 23               |
| Y3   | 13–Nov–2013 | 12–Nov–2014 | 9.8          | 19.7 | 47              | 18.3           | 489 | 4.8             | 31               |
| Y4   | 13–Nov–2014 | 12–Nov–2015 | 9.4          | 23   | 48              | 20             | 577 | 4.6             | 39               |
| Y5   | 13–Nov–2015 | 12–Nov–2016 | 7.6          | 17.7 | 42              | 25             | 513 | 4.8             | 29               |
| Y6   | 28–Jan–2017 | 27–Jan–2018 | 10.6         | 20   | 44              | 21             | 534 | 4.5             | 28               |
| Y7   | 28–Jan–2018 | 27–Jan–2019 | 10.3         | 17.2 | 43              | 21             | 669 | 5.2             | 36               |
| Y8   | 28–Jan–2019 | 27–Jan–2020 | 10.7         | 26   | 42              | 20             | 625 | 4.9             | 34               |
| Y9   | 28–Jan–2020 | 27–Jan–2021 | 8.6          | 10.8 | 33              | 25             | 526 | 5.0             | 26               |
| Y10  | 28–Jan–2021 | 27–Jan–2022 | 9.6          | 12.9 | 36              | 28             | 589 | 4.5             | 25               |
| Y11  | 28–Jan–2022 | 28–Jan–2023 | 9.0          | 10.5 | 31              | 35             | 607 | 5.2             | 22               |

**Table S2.** Seasonal means  $\pm$  standard deviations of the air temperature ( $T$ , in  $^{\circ}\text{C}$ ), relative humidity (RH, in %), wind speed above the rooftop level (WS, in  $\text{m s}^{-1}$ ) and global radiation for individual values  $> 10 \text{ W m}^{-2}$  (GRad, in  $\text{W m}^{-2}$ ) over the investigated years.

| Parameter | spring         | summer         | autumn         | winter        |
|-----------|----------------|----------------|----------------|---------------|
| $T$       | 13.1 $\pm$ 6.4 | 23.4 $\pm$ 4.9 | 13.0 $\pm$ 6.4 | 2.9 $\pm$ 4.4 |
| RH        | 60 $\pm$ 19    | 59 $\pm$ 18    | 75 $\pm$ 20    | 80 $\pm$ 16   |
| WS        | 3.0 $\pm$ 1.9  | 2.7 $\pm$ 1.6  | 2.4 $\pm$ 1.6  | 2.8 $\pm$ 1.9 |
| GRad      | 375 $\pm$ 211  | 442 $\pm$ 257  | 261 $\pm$ 145  | 163 $\pm$ 83  |

22  
23  
24  
25  
26  
27  
28  
29  
30  
31  
32  
33  
34  
35  
36  
37  
38  
39  
40  
41  
42  
43  
44

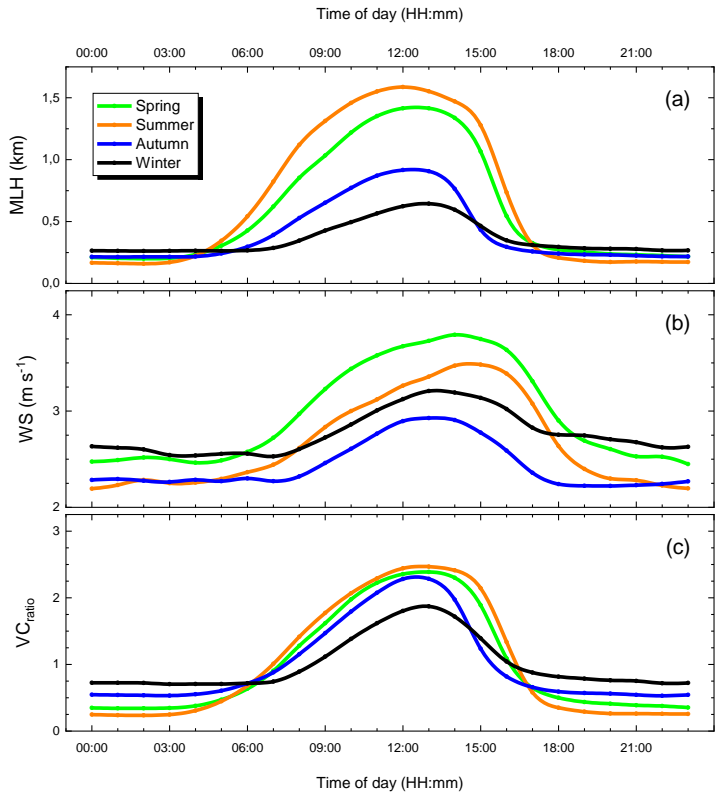

45 **Figure S1.** Mean diel variation of the planetary boundary mixing layer height (MLH; a), wind speed (WS; b) and ventilation  
46 coefficient ratio (VC<sub>ratio</sub>; c) separately for spring, summer, autumn and winter.

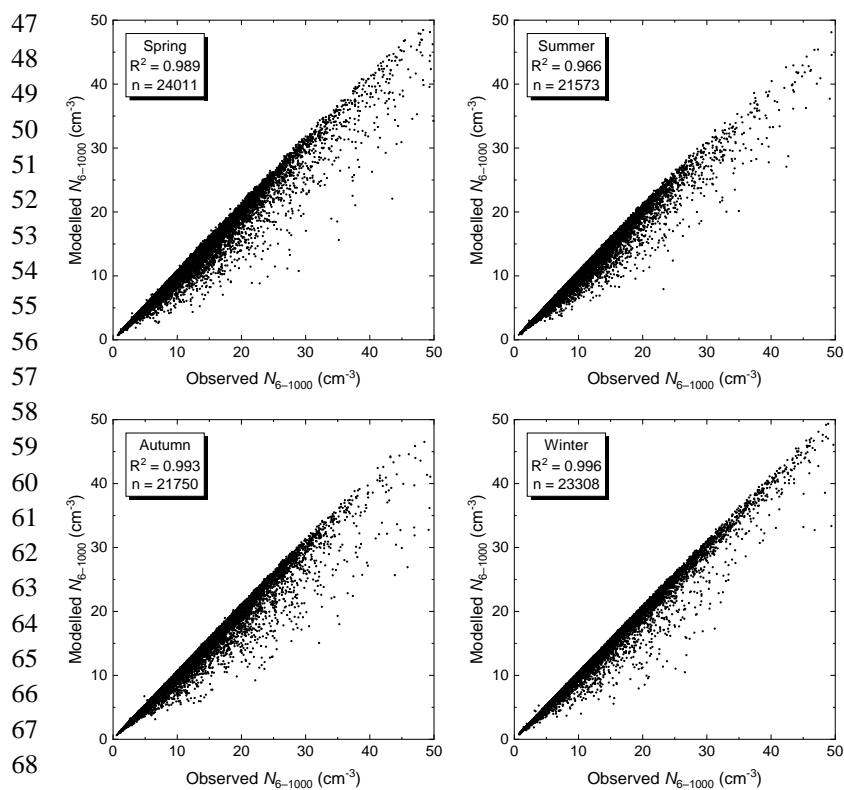

70 **Figure S2.** Scatter plots of the modelled (by uncorrected PMF approach) and measured total particle number concentrations  
71 ( $N_{6-1000}$ ) for spring, summer, autumn and winter. The coefficient of determination ( $R^2$ ) and total number of observations ( $n$ )  
72 are also indicated.

73

74

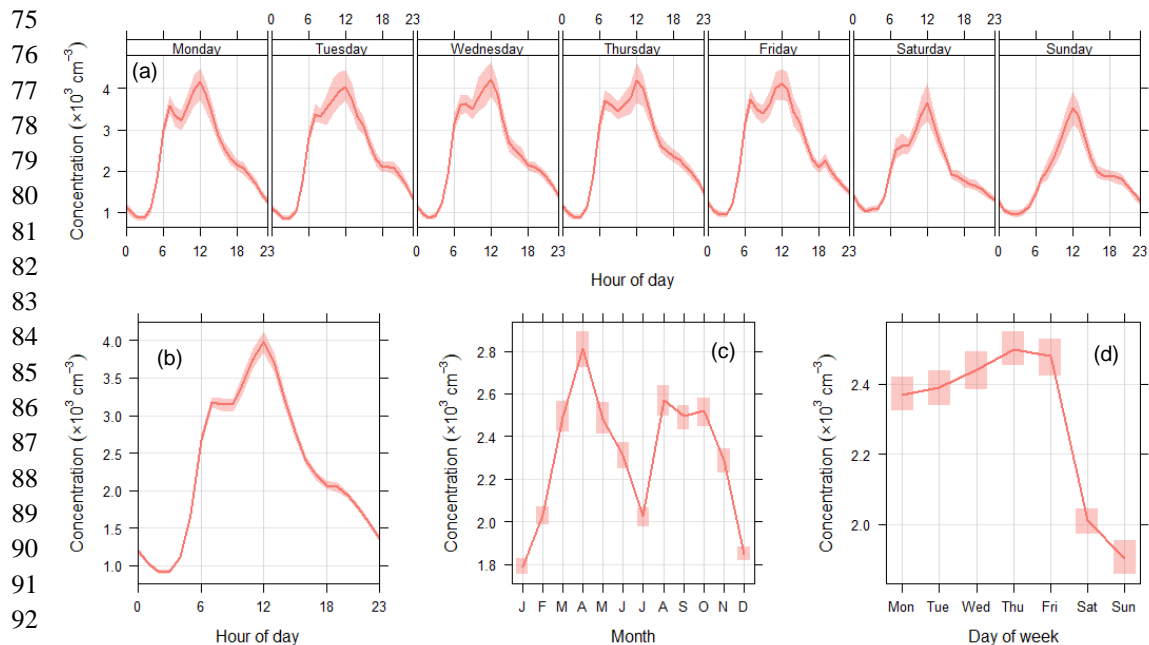

94 **Figure S3.** Mean variations of the total particle number concentration associated with the nucleation source as diel time series  
95 for day of week (a), for all days (b), as monthly means for month of year (c) and as daily means for day of week (d). The  
96 coloured bands around the lines indicate 95 % confidence interval of the mean.

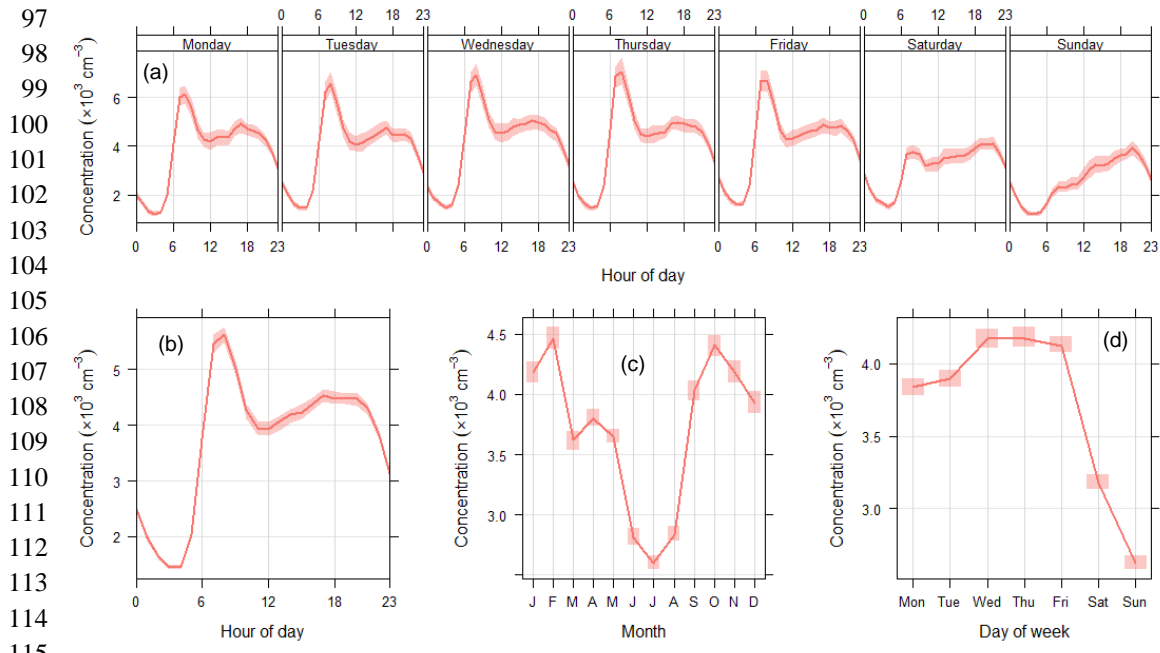

116 **Figure S4.** Mean variations of the total particle number concentration associated with the vehicle traffic semi-volatile fraction  
117 as diel time series for day of week (a), for all days (b), as monthly means for month of year (c) and as daily means for day of  
118 week (d). The coloured bands around the lines indicate 95 % confidence interval of the mean.

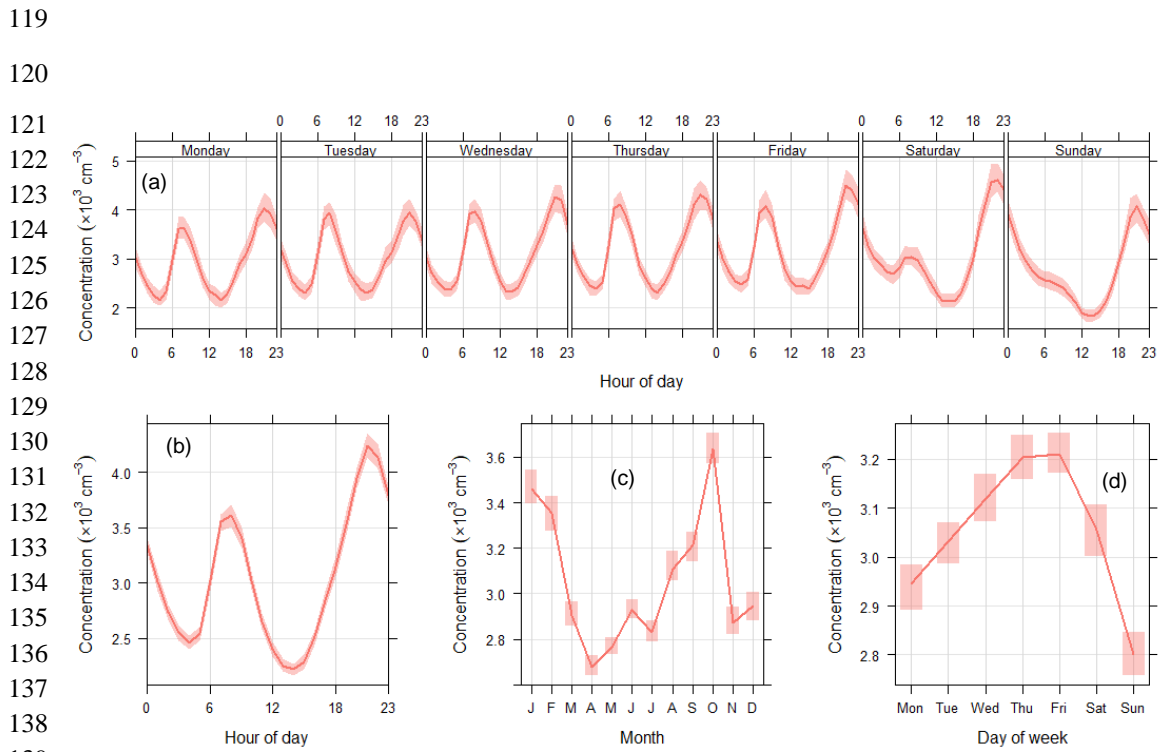

140 **Figure S5.** Mean variations of the total particle number concentration associated with vehicle traffic solid fraction as diel time  
141 series for day of week (a), for all days (b), as monthly means for month of year (c) and as daily means for day of week (d).  
142 The coloured bands around the lines indicate 95 % confidence interval of the mean.

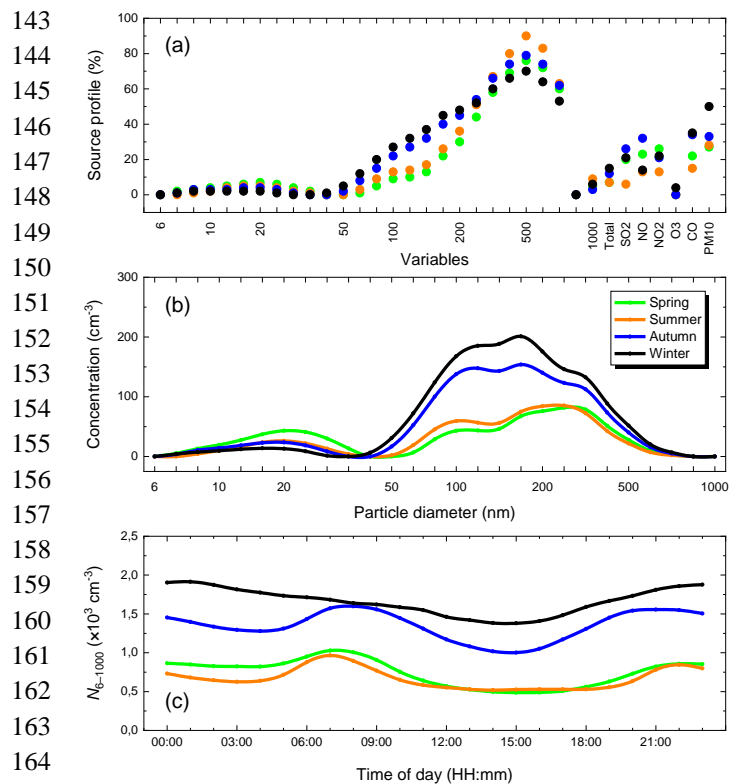

165 **Figure S6.** Relative factor profile (a), factor contribution to the particle number concentrations in the size channels (b), and  
166 the mean diel variation of the total particle number ( $N_{6-1000}$ ; c) assigned to the urban diffuse source for spring, summer, autumn  
167 and winter. The exact diameters of the size channels are listed in Sect. 2.1.

168

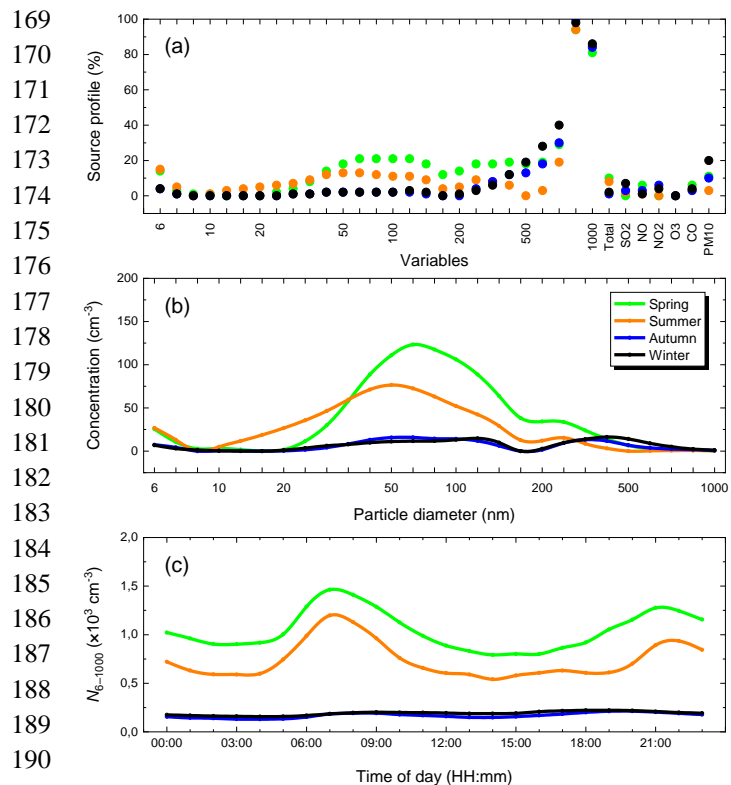

191 **Figure S7.** Relative factor profile (a), factor contribution to the particle number concentrations in the size channels (b), and  
192 the mean diel variation of the total particle number ( $N_{6-1000}$ ; c) assigned to the source of secondary inorganic aerosol for spring,  
193 summer, autumn and winter. The exact diameters of the size channels are listed in Sect. 2.1.

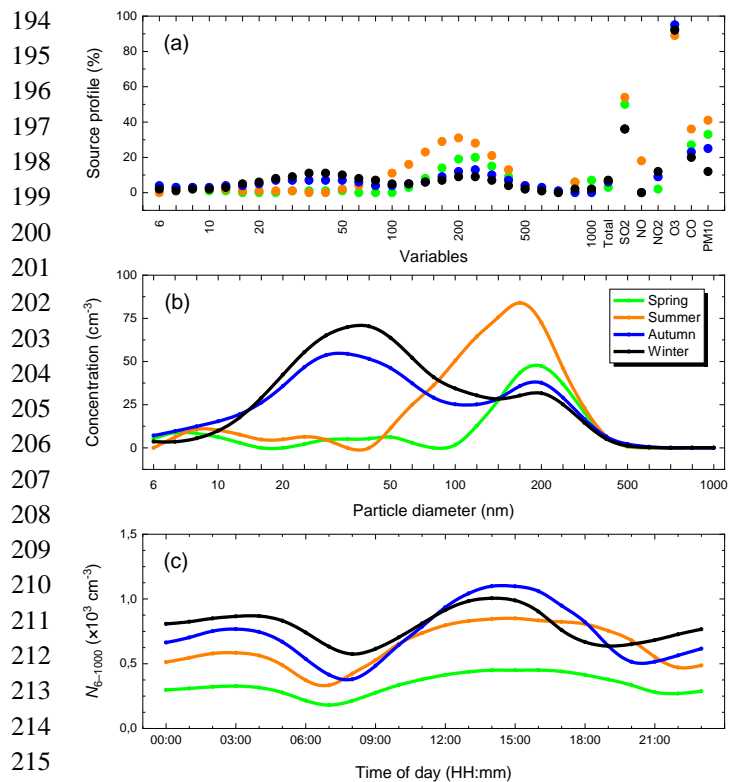

216 **Figure S8.** Relative factor profile (a), factor contribution to the particle number concentrations in the size channels (b), and  
217 the mean diel variation of the total particle number ( $N_{6-1000}$ ; c) assigned to the source of  $\text{O}_3$ -associated secondary aerosol for  
218 spring, summer, autumn and winter. The exact diameters of the size channels are listed in Sect. 2.1.

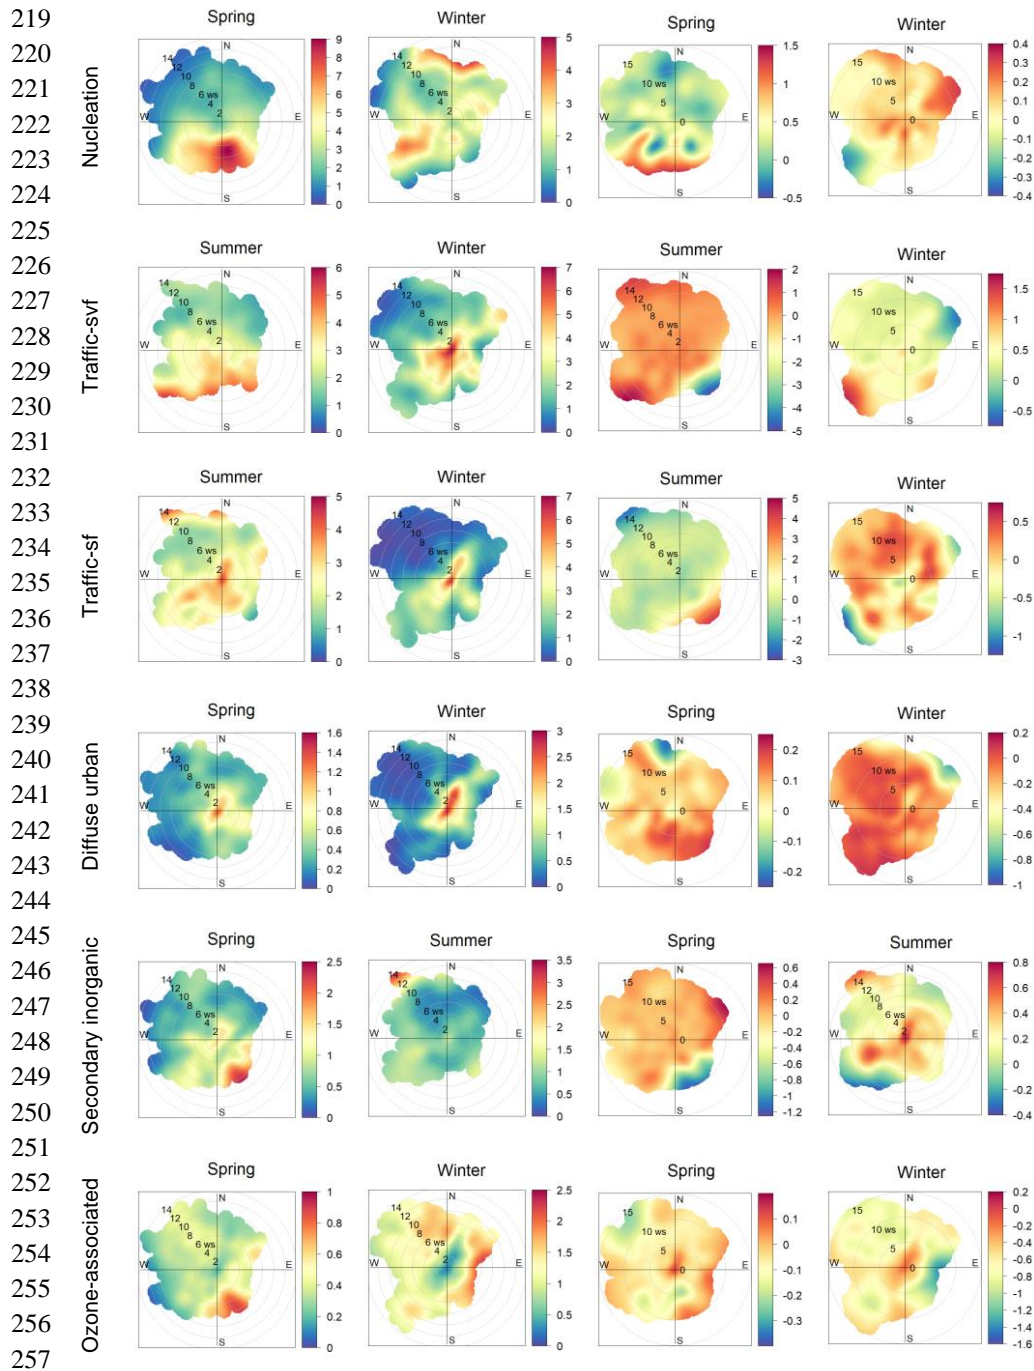

258 **Figure S9.** Conditional bivariate probability plots of the contributions from nucleation, traffic semi-volatile fraction (traffic-  
259 svf), traffic solid fraction (traffic-sf), diffuse urban, secondary inorganic aerosol and ozone-associated secondary aerosol  
260 sources derived by uncorrected PMF approach to the total particle number concentration ( $N_{6-1000}$ ; in  $10^3 \text{ cm}^{-3}$ ; first and second  
261 columns from left), and the (DC-PMF – uncorrected PMF) difference for the  $N_{6-1000}$  (in  $10^3 \text{ cm}^{-3}$ ; third and fourth columns  
262 from left) in selected season pairs. The values of WS are given in  $\text{m s}^{-1}$ . Note the different scales of the colour bar.
